# Supplementary material for: Factors Influencing Adherence to the Risk Management Program for Women With a Genetic Predisposition to Breast Cancer: Real-World Data from a French Multicenter Program
Source: PubMed Central journal article supplement (PMC11299934; doi:10.1093/oncolo/oyae057), 2024-04-02
Supplement: oyae057_suppl_supplementary_tables.pdf [file oyae057_suppl_supplementary_tables.pdf]

## Supplementary Tables

### Factors Influencing Adherence to the Risk Management Program for Women with a Genetic Predisposition to Breast Cancer: Real-World Data from a French Multicenter Program

Supplementary Table 1. Univariable analysis

| Covariables                           | N    | Outcome: Postponed screening rounds |         |                 |         |                 |         |
|---------------------------------------|------|-------------------------------------|---------|-----------------|---------|-----------------|---------|
|                                       |      | Margin = 4 mths                     |         | Margin = 6 mths |         | Margin = 8 mths |         |
|                                       |      | n (%)                               | p-value | n (%)           | p-value | n (%)           | p-value |
| 1 observation = 1 MRI screening round |      |                                     |         |                 |         |                 |         |
| N of screening round                  |      |                                     | <0.01   |                 | <0.001  |                 | <0.001  |
| 1st round                             | 750  | 63 (8)                              |         | 26 (3)          |         | 7 (1)           |         |
| 2nd round                             | 688  | 73 (11)                             |         | 56 (8)          |         | 37 (5)          |         |
| 3rd to 6th rounds                     | 1358 | 88 (6)                              |         | 56 (4)          |         | 36 (3)          |         |
| Year of the screening round           |      |                                     | <0.001  |                 | <0.001  |                 | <0.001  |
| 2015 to 2017                          | 1564 | 51 (3)                              |         | 38 (2)          |         | 21 (1)          |         |
| 2018 to 2020                          | 1232 | 110 (9)                             |         | 74 (6)          |         | 52 (4)          |         |
| Age at the screening round            |      |                                     | <0.05   |                 | <0.01   |                 | 0.06    |
| <50 years                             | 1525 | 102 (7)                             |         | 76 (5)          |         | 48 (3)          |         |
| ≥50 years                             | 1271 | 59 (5)                              |         | 36 (3)          |         | 25 (2)          |         |
| Number of past recall exams**         |      |                                     | <0.01   |                 | <0.01   |                 | 0.11    |
| None                                  | 2336 | 120 (5)                             |         | 82 (4)          |         | 56 (2)          |         |
| 1 or more                             | 460  | 41 (9)                              |         | 30 (7)          |         | 17 (4)          |         |
| Patient Total N of screening rounds   |      |                                     | <0.001  |                 | <0.001  |                 | <0.001  |
| 1 to 4 rounds                         | 1343 | 187 (14)                            |         | 124 (9)         |         | 73 (5)          |         |
| 5 to 6 rounds                         | 1453 | 37 (3)                              |         | 14 (1)          |         | 7 (0)           |         |
| Pathogenic variant                    |      |                                     | 0.68    |                 | 0.62    |                 | 0.911   |
| <i>BRCA1</i>                          | 1017 | 59 (6)                              |         | 36 (4)          |         | 28 (3)          |         |
| <i>BRCA2</i>                          | 790  | 41 (5)                              |         | 33 (4)          |         | 19 (2)          |         |
| V. High Risk w/o <i>BRCA1</i> or 2    | 989  | 61 (6)                              |         | 43 (4)          |         | 26 (3)          |         |
| Birth cohort                          |      |                                     | <0.01   |                 | <0.01   |                 | <0.05   |
| Before 1970                           | 1545 | 72 (5)                              |         | 46 (3)          |         | 31 (2)          |         |
| 1970-1989                             | 1251 | 89 (7)                              |         | 66 (5)          |         | 42 (3)          |         |
| Prevalent BC status                   |      |                                     | <0.01   |                 | <0.05   |                 | 0.29    |
| Without                               | 1497 | 103 (7)                             |         | 72 (5)          |         | 44 (3)          |         |
| With                                  | 1299 | 58 (4)                              |         | 40 (3)          |         | 29 (2)          |         |
| Standard of living of the town/city   |      |                                     | 0.29    |                 | 0.29    |                 | 0.56    |
| Low (<20479€)                         | 1440 | 76 (5)                              |         | 52 (4)          |         | 35 (2)          |         |
| High (≥20479€)                        | 1356 | 85 (6)                              |         | 60 (4)          |         | 38 (3)          |         |
| APL-GP of the town/city               |      |                                     | 0.57    |                 | 0.44    |                 | <0.05   |
| Low APL-GP (<3.7)                     | 1455 | 80 (5)                              |         | 54 (4)          |         | 29 (2)          |         |
| High APL-GP (≥3.7)                    | 1341 | 81 (6)                              |         | 58 (4)          |         | 44 (3)          |         |
| N of MRI/200 k hab. in the county     |      |                                     | 0.06    |                 | 0.05    |                 | 0.29    |
| <1.9                                  | 1485 | 74 (5)                              |         | 49 (3)          |         | 34 (2)          |         |
| ≥1.9                                  | 1311 | 87 (7)                              |         | 63 (5)          |         | 39 (3)          |         |

Supplementary Table 2. Mixed-effect models

|                                         | 6 months margin         |                                             |                                  |                                  |
|-----------------------------------------|-------------------------|---------------------------------------------|----------------------------------|----------------------------------|
|                                         | Model 0:<br>Empty model | Model 1:<br>Empty<br>random effect<br>model | Model 2:<br>Intermediate modal   | Model 3:<br>Full model           |
| Level 1 - screening rounds, OR (95% CI) |                         |                                             |                                  |                                  |
| N of screening round                    | -                       | -                                           | ***                              | ***                              |
| 1st round                               | -                       | -                                           | 0.421 (0.248 to 0.716)***        | <b>0.387 (0.231 to 0.648)***</b> |
| 2nd round                               | -                       | -                                           | Ref                              | Ref                              |
| 3rd to 6th rounds                       | -                       | -                                           | 0.315 (0.189 to 0.525)***        | <b>0.609 (0.375 to 0.989)*</b>   |
| Year of the screening round             | -                       | -                                           | ***                              | *                                |
| 2015 to 2017                            | -                       | -                                           | Ref                              | Ref                              |
| 2018 to 2020                            | -                       | -                                           | 2.590 (1.577 to 4.252)***        | <b>1.612 (1.005 to 2.586)*</b>   |
| Age at the screening round              | -                       | -                                           |                                  |                                  |
| <50 years                               | -                       | -                                           | Ref                              | Ref                              |
| ≥50 years                               | -                       | -                                           | 0.623 (0.304 to 1.278)           | <b>0.597 (0.310 to 1.150)</b>    |
| Number of past recall exams             | -                       | -                                           | *                                | *                                |
| None                                    | -                       | -                                           | Ref                              | Ref                              |
| 1 or more                               | -                       | -                                           | 1.663 (1.006 to 2.750)*          | <b>1.619 (1.003 to 2.613)*</b>   |
| Level 2 - Women                         |                         |                                             |                                  |                                  |
| Fixed effect, OR (95% CI)               |                         |                                             |                                  |                                  |
| Patient Total N of screening rounds     | -                       | -                                           | -                                | ***                              |
| 1 to 4 rounds                           | -                       | -                                           | -                                | Ref                              |
| 5 to 6 rounds                           | -                       | -                                           | -                                | <b>0.098 (0.054 to 0.177)***</b> |
| Mutation status                         | -                       | -                                           | -                                |                                  |
| BRCA1                                   | -                       | -                                           | -                                | Ref                              |
| BRCA2                                   | -                       | -                                           | -                                | <b>1.289 (0.791 to 2.101)</b>    |
| V. High Risk w/o BRCA1 or 2             | -                       | -                                           | -                                | <b>0.863 (0.536 to 1.388)</b>    |
| Birth cohort                            | -                       | -                                           | -                                |                                  |
| Before 1970                             | -                       | -                                           | -                                | Ref                              |
| 1970-1989                               | -                       | -                                           | -                                | <b>0.700 (0.367 to 1.320)</b>    |
| Prevalent BC status                     | -                       | -                                           | -                                |                                  |
| Without                                 | -                       | -                                           | -                                | Ref                              |
| With                                    | -                       | -                                           | -                                | <b>0.923 (0.609 to 1.397)</b>    |
| Standard of living of the town/city     | -                       | -                                           | -                                |                                  |
| Low (Median<20479€)                     | -                       | -                                           | -                                | Ref                              |
| High (Median≥20479€)                    | -                       | -                                           | -                                | <b>1.112 (0.749 to 1.652)</b>    |
| APL-GP of the town/city                 | -                       | -                                           | -                                |                                  |
| Low APL-GP (<3.7)                       | -                       | -                                           | -                                | Ref                              |
| High APL-GP (≥3.7)                      | -                       | -                                           | -                                | <b>1.11 (0.753 to 1.636)</b>     |
| N of MRI/200 k hab. in the county       | -                       | -                                           | -                                |                                  |
| <1.9                                    | -                       | -                                           | -                                | Ref                              |
| ≥1.9                                    | -                       | -                                           | -                                | <b>1.14 (0.770 to 1.689)</b>     |
| Random effect                           |                         |                                             |                                  |                                  |
| Variance of random intercept, (95% CI)  | -                       | 0.582 (0.085 to 4.001)                      | 0.614 (0.105 to 3.601)           | <b>0.039 (0.039 to 0.039)</b>    |
| Random slope                            | -                       |                                             | Age at screening round, centered |                                  |
| Variance of Random slope, (95% CI)      | -                       | 0.006 (0.002 to 0.020)                      | 0.007 (0.002 to 0.244)           | <b>0.005 (0.005 to 0.005)</b>    |
| VPC of Random effect                    | -                       | 0.150 (0.025 to 0.549)                      | 0.160 (0.031 to 0.523)           | <b>0.012 (0.012 to 0.012)</b>    |
| Bayesian Information Criterion (BIC)    | 1107.409                | 1105.999                                    | 1105.943                         | <b>1081.635</b>                  |

Supplementary Table 3. Sensitivity analysis (4 months margin)

|                                         | 4 months margin         |                                             |                                  |                                  |
|-----------------------------------------|-------------------------|---------------------------------------------|----------------------------------|----------------------------------|
|                                         | Model 0:<br>Empty model | Model 1:<br>Empty<br>random effect<br>model | Model 2:<br>Intermediate modal   | Model 3:<br>Full model           |
| Level 1 - screening rounds, OR (95% CI) |                         |                                             |                                  |                                  |
| N of screening round                    | -                       | -                                           | ***                              |                                  |
| 1st round                               | -                       | -                                           | 0.866 (0.580 to 1.293)           | <b>0.790 (0.533 to 1.171)</b>    |
| 2nd round                               | -                       | -                                           | Ref                              | <b>Ref</b>                       |
| 3rd to 6th rounds                       | -                       | -                                           | 0.392 (0.251 to 0.613)***        | <b>0.667 (0.435 to 1.022)</b>    |
| Year of the screening round             | -                       | -                                           | ***                              | *                                |
| 2015 to 2017                            | -                       | -                                           | Ref                              | <b>Ref</b>                       |
| 2018 to 2020                            | -                       | -                                           | 2.444 (1.600 to 3.744)***        | <b>1.554 (1.034 to 2.333)*</b>   |
| Age at the screening round              | -                       | -                                           | *                                |                                  |
| <50 years                               | -                       | -                                           | Ref                              | <b>Ref</b>                       |
| >=50 years                              | -                       | -                                           | 0.566 (0.323 to 0.990)*          | <b>0.785 (0.411 to 1.503)</b>    |
| Number of past recall exams             | -                       | -                                           |                                  |                                  |
| None                                    | -                       | -                                           | Ref                              | <b>Ref</b>                       |
| 1 or more                               | -                       | -                                           | 1.463 (0.926 to 2.312)           | <b>1.507 (0.985 to 2.305)</b>    |
| Level 2 - Women                         |                         |                                             |                                  |                                  |
| Fixed effect, OR (95% CI)               |                         |                                             |                                  |                                  |
| Patient Total N of screening rounds     | -                       | -                                           | -                                | ***                              |
| 1 to 4 rounds                           | -                       | -                                           | -                                | <b>Ref</b>                       |
| 5 to 6 rounds                           | -                       | -                                           | -                                | <b>0.165 (0.108 to 0.253)***</b> |
| Mutation status                         | -                       | -                                           | -                                |                                  |
| BRCA1                                   | -                       | -                                           | -                                | <b>Ref</b>                       |
| BRCA2                                   | -                       | -                                           | -                                | <b>0.968 (0.632 to 1.482)</b>    |
| V. High Risk w/o BRCA1 or 2             | -                       | -                                           | -                                | <b>0.800 (0.535 to 1.195)</b>    |
| Birth cohort                            | -                       | -                                           | -                                |                                  |
| Before 1970                             | -                       | -                                           | -                                | <b>Ref</b>                       |
| 1970-1989                               | -                       | -                                           | -                                | <b>0.984 (0.535 to 1.811)</b>    |
| Prevalent BC status                     | -                       | -                                           | -                                |                                  |
| Without                                 | -                       | -                                           | -                                | <b>Ref</b>                       |
| With                                    | -                       | -                                           | -                                | <b>0.698 (0.479 to 1.016)</b>    |
| Standard of living of the town/city     | -                       | -                                           | -                                |                                  |
| Low (Median<20479€)                     | -                       | -                                           | -                                | <b>Ref</b>                       |
| High (Median>=20479€)                   | -                       | -                                           | -                                | <b>0.945 (0.671 to 1.331)</b>    |
| APL-GP of the town/city                 | -                       | -                                           | -                                |                                  |
| Low APL-GP (<3.7)                       | -                       | -                                           | -                                | <b>Ref</b>                       |
| High APL-GP (>=3.7)                     | -                       | -                                           | -                                | <b>0.979 (0.700 to 1.369)</b>    |
| N of MRI/200 k hab. in the county       | -                       | -                                           | -                                |                                  |
| <1.9                                    | -                       | -                                           | -                                | <b>Ref</b>                       |
| >=1.9                                   | -                       | -                                           | -                                | <b>1.224 (0.974 to 1.715)</b>    |
| Random effect                           |                         |                                             |                                  |                                  |
| Variance of random intercept, (95% CI)  | -                       | 1.307 (0.637 to 2.681)                      | 1.101 (0.496 to 2.445)           | 0.544 (0.147 to 2.014)           |
| Random slope                            | -                       |                                             | Age at screening round, centered |                                  |
| Variance of Random slope, (95% CI)      | -                       | 0.006 (0.001 to 0.023)                      | 0.007 (0.002 to 0.025)           | 0.003 (0.000 to 0.029)           |
| VPC of Random effect                    | -                       | 0.284 (0.162 to 0.449)                      | 0.251 (0.131 to 0.426)           | 0.142 (0.043 to 0.380)           |
| Bayesian Information Criterion (BIC)    | 1542.179                | 1551.468                                    | 1528.686                         | 1528.686                         |

Supplementary Table 4. Sensitivity analysis (8 months margin)

|                                         | 8 months margin         |                                             |                                  |                           |
|-----------------------------------------|-------------------------|---------------------------------------------|----------------------------------|---------------------------|
|                                         | Model 0:<br>Empty model | Model 1:<br>Empty<br>random<br>effect model | Model 2:<br>Intermediate modal   | Model 3:<br>Full model    |
| Level 1 - screening rounds, OR (95% CI) |                         |                                             |                                  |                           |
| N of screening round                    | -                       | -                                           | ***                              | ***                       |
| 1st round                               | -                       | -                                           | 0.156 (0.061 to 0.400)***        | 0.153 (0.061 to 0.380)*** |
| 2nd round                               | -                       | -                                           | Ref                              | Ref                       |
| 3rd to 6th rounds                       | -                       | -                                           | 0.260 (0.135 to 0.500)***        | 0.512 (0.276 to 0.948)*   |
| Year of the screening round             | -                       | -                                           | ***                              |                           |
| 2015 to 2017                            | -                       | -                                           | Ref                              | Ref                       |
| 2018 to 2020                            | -                       | -                                           | 4.095 (2.056 to 8.040)***        | 2.603 (1.360 to 4.984)**  |
| Age at the screening round              | -                       | -                                           |                                  |                           |
| <50 years                               | -                       | -                                           | Ref                              | Ref                       |
| >=50 years                              | -                       | -                                           | 0.366 (0.109 to 1.233)           | 0.524 (0.162 to 1.688)    |
| Number of past recall exams             | -                       | -                                           |                                  |                           |
| None                                    | -                       | -                                           | Ref                              | Ref                       |
| 1 or more                               | -                       | -                                           | 1.361 (0.688 to 2.693)           | 1.438 (0.746 to 2.775)    |
| Level 2 - Women                         |                         |                                             |                                  |                           |
| Fixed effect, OR (95% CI)               |                         |                                             |                                  |                           |
| Patient Total N of screening rounds     | -                       | -                                           | -                                |                           |
| 1 to 4 rounds                           | -                       | -                                           | -                                | Ref                       |
| 5 to 6 rounds                           | -                       | -                                           | -                                | 0.083 (0.035 to 0.196)*** |
| Mutation status                         | -                       | -                                           | -                                |                           |
| BRCA1                                   | -                       | -                                           | -                                | Ref                       |
| BRCA2                                   | -                       | -                                           | -                                | 0.959 (0.488 to 1.884)    |
| V. High Risk w/o BRCA1 or 2             | -                       | -                                           | -                                | 0.582 (0.294 to 1.152)    |
| Birth cohort                            | -                       | -                                           | -                                |                           |
| Before 1970                             | -                       | -                                           | -                                | Ref                       |
| 1970-1989                               | -                       | -                                           | -                                | 0.688 (0.251 to 1.882)    |
| Prevalent BC status                     | -                       | -                                           | -                                |                           |
| Without                                 | -                       | -                                           | -                                | Ref                       |
| With                                    | -                       | -                                           | -                                | 1.045 (0.584 to 1.868)    |
| Standard of living of the town/city     | -                       | -                                           | -                                |                           |
| Low (Median<20479€)                     | -                       | -                                           | -                                | Ref                       |
| High (Median>=20479€)                   | -                       | -                                           | -                                | 0.939 (0.546 to 1.616)    |
| APL-GP of the town/city                 | -                       | -                                           | -                                |                           |
| Low APL-GP (<3.7)                       | -                       | -                                           | -                                | Ref                       |
| High APL-GP (>=3.7)                     | -                       | -                                           | -                                | 1.79 (1.044 to 3.069)     |
| N of MRI/200 k hab. in the county       | -                       | -                                           | -                                |                           |
| <1.9                                    | -                       | -                                           | -                                | Ref                       |
| >=1.9                                   | -                       | -                                           | -                                | 1.212 (0.710 to 2.069)    |
| Random effect                           |                         |                                             |                                  |                           |
| Variance of random intercept, (95% CI)  | -                       | 0.659 (0.056 to 7.690)                      | 0.92 (0.110 to 7.677)            | 0.168 (0.000 to 1936.6)   |
| Random slope                            | -                       |                                             | Age at screening round, centered |                           |
| Variance of Random slope, (95% CI)      | -                       | 0.006 (0.002 to 0.020)                      | 0.007 (0.002 to 0.025)           | 0.018 (0.006 to 0.052)    |
| VPC of Random effect                    | -                       | 0.167 (0.017 to 0.700)                      | 0.219 (0.032 to 0.700)           | 0.049 (4.45e-06 to 0.998) |
| Bayesian Information Criterion (BIC)    | 734.252                 | 746.993                                     | 732.173                          | 737.574                   |
